# Supplementary material for: Title: The complete chloroplast genome of Onobrychis gaubae (Fabaceae-Papilionoideae): comparative analysis with related IR-lacking clade species
Source: Research Square preprint supplement (doi:10.21203/rs.3.rs-290026/v1), 2021-03-15
Supplement: Supplementary file 2 [file fc92728871588f4300201e6d.xlsx]

## Sheet: S4 Table 
Table S4. Putative preferred codons in the IRLC plastid genomes. RSCU = relative synonymous codon usage.
Astragalus mongholicus									Caragana microphylla									Carmichaelia australis									Cicer arietinum									Glycyrrhiza glabra									Hedysarum semenovii
Amino Acid	Codon	Count	RSCU		Codon	Count	RSCU			Codon	Count	RSCU		Codon	Count	RSCU			Codon	Count	RSCU		Codon	Count	RSCU			Codon	Count	RSCU		Codon	Count	RSCU			Codon	Count	RSCU		Codon	Count	RSCU			Codon	Count	RSCU
Phe	UUU(F)	921	1.42	Tyr	UAU(Y)	683	1.64		Phe	UUU(F)	894	1.38	Tyr	UAU(Y)	683	1.64		Phe	UUU(F)	915	1.42	Tyr	UAU(Y)	666	1.64		Phe	UUU(F)	921	1.42	Tyr	UAU(Y)	678	1.65		Phe	UUU(F)	923	1.4	Tyr	UAU(Y)	678	1.66		Phe	UUU(F)	918	1.4	Tyr
Phe	UUC(F)	378	0.58	Tyr	UAC(Y)	151	0.36		Phe	UUC(F)	401	0.62	Tyr	UAC(Y)	149	0.36		Phe	UUC(F)	374	0.58	Tyr	UAC(Y)	146	0.36		Phe	UUC(F)	372	0.58	Tyr	UAC(Y)	143	0.35		Phe	UUC(F)	392	0.6	Tyr	UAC(Y)	140	0.34		Phe	UUC(F)	390	0.6	Tyr
Leu	UUA(L)	816	2.08	Stop	UAA(*)	43	1.7		Leu	UUA(L)	787	2.03	Stop	UAA(*)	41	1.62		Leu	UUA(L)	818	2.09	Stop	UAA(*)	41	1.64		Leu	UUA(L)	822	2.14	Stop	UAA(*)	43	1.7		Leu	UUA(L)	792	2.04	Stop	UAA(*)	42	1.66		Leu	UUA(L)	799	2.05	Stop
Leu	UUG(L)	480	1.23	Stop	UAG(*)	15	0.59		Leu	UUG(L)	485	1.25	Stop	UAG(*)	15	0.59		Leu	UUG(L)	478	1.22	Stop	UAG(*)	14	0.56		Leu	UUG(L)	486	1.26	Stop	UAG(*)	14	0.55		Leu	UUG(L)	492	1.27	Stop	UAG(*)	13	0.51		Leu	UUG(L)	492	1.26	Stop
Leu	CUU(L)	487	1.24	His	CAU(H)	385	1.57		Leu	CUU(L)	474	1.22	His	CAU(H)	396	1.56		Leu	CUU(L)	476	1.22	His	CAU(H)	385	1.58		Leu	CUU(L)	457	1.19	His	CAU(H)	373	1.53		Leu	CUU(L)	473	1.22	His	CAU(H)	393	1.58		Leu	CUU(L)	472	1.21	His
Leu	CUC(L)	136	0.35	His	CAC(H)	105	0.43		Leu	CUC(L)	138	0.36	His	CAC(H)	112	0.44		Leu	CUC(L)	137	0.35	His	CAC(H)	103	0.42		Leu	CUC(L)	118	0.31	His	CAC(H)	113	0.47		Leu	CUC(L)	124	0.32	His	CAC(H)	106	0.42		Leu	CUC(L)	134	0.34	His
Leu	CUA(L)	308	0.79	Gln	CAA(Q)	615	1.58		Leu	CUA(L)	306	0.79	Gln	CAA(Q)	631	1.6		Leu	CUA(L)	308	0.79	Gln	CAA(Q)	613	1.59		Leu	CUA(L)	301	0.78	Gln	CAA(Q)	614	1.59		Leu	CUA(L)	304	0.78	Gln	CAA(Q)	641	1.6		Leu	CUA(L)	307	0.79	Gln
Leu	CUG(L)	122	0.31	Gln	CAG(Q)	162	0.42		Leu	CUG(L)	137	0.35	Gln	CAG(Q)	158	0.4		Leu	CUG(L)	128	0.33	Gln	CAG(Q)	160	0.41		Leu	CUG(L)	124	0.32	Gln	CAG(Q)	159	0.41		Leu	CUG(L)	141	0.36	Gln	CAG(Q)	160	0.4		Leu	CUG(L)	130	0.33	Gln
Ile	AUU(I)	972	1.47	Asn	AAU(N)	851	1.55		Ile	AUU(I)	970	1.47	Asn	AAU(N)	828	1.56		Ile	AUU(I)	993	1.51	Asn	AAU(N)	848	1.56		Ile	AUU(I)	1010	1.51	Asn	AAU(N)	833	1.58		Ile	AUU(I)	985	1.5	Asn	AAU(N)	852	1.56		Ile	AUU(I)	970	1.48	Asn
Ile	AUC(I)	364	0.55	Asn	AAC(N)	247	0.45		Ile	AUC(I)	380	0.58	Asn	AAC(N)	233	0.44		Ile	AUC(I)	346	0.52	Asn	AAC(N)	239	0.44		Ile	AUC(I)	322	0.48	Asn	AAC(N)	223	0.42		Ile	AUC(I)	351	0.53	Asn	AAC(N)	240	0.44		Ile	AUC(I)	358	0.55	Asn
Ile	AUA(I)	641	0.97	Lys	AAA(K)	930	1.56		Ile	AUA(I)	632	0.96	Lys	AAA(K)	919	1.55		Ile	AUA(I)	640	0.97	Lys	AAA(K)	926	1.56		Ile	AUA(I)	675	1.01	Lys	AAA(K)	967	1.59		Ile	AUA(I)	633	0.96	Lys	AAA(K)	944	1.56		Ile	AUA(I)	635	0.97	Lys
Met	AUG(M)	500	1	Lys	AAG(K)	261	0.44		Met	AUG(M)	501	1	Lys	AAG(K)	267	0.45		Met	AUG(M)	506	1	Lys	AAG(K)	262	0.44		Met	AUG(M)	479	1	Lys	AAG(K)	251	0.41		Met	AUG(M)	512	1	Lys	AAG(K)	270	0.44		Met	AUG(M)	519	1	Lys
Val	GUU(V)	454	1.48	Asp	GAU(D)	697	1.63		Val	GUU(V)	459	1.52	Asp	GAU(D)	711	1.62		Val	GUU(V)	463	1.53	Asp	GAU(D)	691	1.6		Val	GUU(V)	460	1.53	Asp	GAU(D)	729	1.63		Val	GUU(V)	461	1.52	Asp	GAU(D)	717	1.64		Val	GUU(V)	460	1.51	Asp
Val	GUC(V)	140	0.46	Asp	GAC(D)	160	0.37		Val	GUC(V)	134	0.44	Asp	GAC(D)	168	0.38		Val	GUC(V)	134	0.44	Asp	GAC(D)	174	0.4		Val	GUC(V)	135	0.45	Asp	GAC(D)	164	0.37		Val	GUC(V)	134	0.44	Asp	GAC(D)	155	0.36		Val	GUC(V)	130	0.43	Asp
Val	GUA(V)	474	1.55	Glu	GAA(E)	879	1.55		Val	GUA(V)	461	1.53	Glu	GAA(E)	890	1.54		Val	GUA(V)	458	1.52	Glu	GAA(E)	862	1.54		Val	GUA(V)	478	1.59	Glu	GAA(E)	888	1.57		Val	GUA(V)	463	1.53	Glu	GAA(E)	897	1.51		Val	GUA(V)	461	1.52	Glu
Val	GUG(V)	156	0.51	Glu	GAG(E)	256	0.45		Val	GUG(V)	154	0.51	Glu	GAG(E)	268	0.46		Val	GUG(V)	154	0.51	Glu	GAG(E)	257	0.46		Val	GUG(V)	128	0.43	Glu	GAG(E)	244	0.43		Val	GUG(V)	156	0.51	Glu	GAG(E)	293	0.49		Val	GUG(V)	164	0.54	Glu
Ser	UCU(S)	475	1.76	Cys	UGU(C)	186	1.52		Ser	UCU(S)	470	1.72	Cys	UGU(C)	200	1.54		Ser	UCU(S)	478	1.77	Cys	UGU(C)	179	1.51		Ser	UCU(S)	488	1.82	Cys	UGU(C)	186	1.53		Ser	UCU(S)	468	1.69	Cys	UGU(C)	196	1.5		Ser	UCU(S)	477	1.7	Cys
Ser	UCC(S)	233	0.86	Cys	UGC(C)	58	0.48		Ser	UCC(S)	234	0.86	Cys	UGC(C)	59	0.46		Ser	UCC(S)	245	0.91	Cys	UGC(C)	58	0.49		Ser	UCC(S)	226	0.84	Cys	UGC(C)	57	0.47		Ser	UCC(S)	231	0.84	Cys	UGC(C)	66	0.5		Ser	UCC(S)	250	0.89	Cys
Ser	UCA(S)	319	1.18	Stop	UGA(*)	18	0.71		Ser	UCA(S)	326	1.2	Stop	UGA(*)	20	0.79		Ser	UCA(S)	316	1.17	Stop	UGA(*)	20	0.8		Ser	UCA(S)	306	1.14	Stop	UGA(*)	19	0.75		Ser	UCA(S)	337	1.22	Stop	UGA(*)	21	0.83		Ser	UCA(S)	307	1.09	Stop
Ser	UCG(S)	148	0.55	Trp	UGG(W)	371	1		Ser	UCG(S)	157	0.58	Trp	UGG(W)	372	1		Ser	UCG(S)	146	0.54	Trp	UGG(W)	374	1		Ser	UCG(S)	140	0.52	Trp	UGG(W)	361	1		Ser	UCG(S)	169	0.61	Trp	UGG(W)	377	1		Ser	UCG(S)	192	0.68	Trp
Pro	CCU(P)	346	1.55	Arg	CGU(R)	276	1.34		Pro	CCU(P)	356	1.58	Arg	CGU(R)	283	1.35		Pro	CCU(P)	349	1.56	Arg	CGU(R)	277	1.38		Pro	CCU(P)	346	1.54	Arg	CGU(R)	286	1.39		Pro	CCU(P)	359	1.59	Arg	CGU(R)	281	1.34		Pro	CCU(P)	379	1.62	Arg
Pro	CCC(P)	169	0.76	Arg	CGC(R)	92	0.45		Pro	CCC(P)	176	0.78	Arg	CGC(R)	87	0.42		Pro	CCC(P)	167	0.74	Arg	CGC(R)	86	0.43		Pro	CCC(P)	159	0.71	Arg	CGC(R)	85	0.41		Pro	CCC(P)	157	0.69	Arg	CGC(R)	92	0.44		Pro	CCC(P)	174	0.74	Arg
Pro	CCA(P)	279	1.25	Arg	CGA(R)	289	1.41		Pro	CCA(P)	270	1.2	Arg	CGA(R)	292	1.39		Pro	CCA(P)	279	1.24	Arg	CGA(R)	287	1.43		Pro	CCA(P)	283	1.26	Arg	CGA(R)	282	1.37		Pro	CCA(P)	278	1.23	Arg	CGA(R)	292	1.39		Pro	CCA(P)	280	1.2	Arg
Pro	CCG(P)	99	0.44	Arg	CGG(R)	83	0.4		Pro	CCG(P)	101	0.45	Arg	CGG(R)	89	0.43		Pro	CCG(P)	102	0.45	Arg	CGG(R)	75	0.37		Pro	CCG(P)	111	0.49	Arg	CGG(R)	78	0.38		Pro	CCG(P)	111	0.49	Arg	CGG(R)	83	0.4		Pro	CCG(P)	102	0.44	Arg
Thr	ACU(T)	466	1.67	Ser	AGU(S)	361	1.34		Thr	ACU(T)	471	1.67	Ser	AGU(S)	352	1.29		Thr	ACU(T)	462	1.67	Ser	AGU(S)	356	1.32		Thr	ACU(T)	463	1.69	Ser	AGU(S)	352	1.32		Thr	ACU(T)	488	1.72	Ser	AGU(S)	351	1.27		Thr	ACU(T)	481	1.72	Ser
Thr	ACC(T)	191	0.69	Ser	AGC(S)	83	0.31		Thr	ACC(T)	191	0.68	Ser	AGC(S)	97	0.36		Thr	ACC(T)	185	0.67	Ser	AGC(S)	82	0.3		Thr	ACC(T)	184	0.67	Ser	AGC(S)	93	0.35		Thr	ACC(T)	192	0.68	Ser	AGC(S)	103	0.37		Thr	ACC(T)	179	0.64	Ser
Thr	ACA(T)	356	1.28	Arg	AGA(R)	368	1.79		Thr	ACA(T)	353	1.25	Arg	AGA(R)	375	1.79		Thr	ACA(T)	352	1.27	Arg	AGA(R)	356	1.78		Thr	ACA(T)	336	1.23	Arg	AGA(R)	364	1.77		Thr	ACA(T)	346	1.22	Arg	AGA(R)	383	1.82		Thr	ACA(T)	340	1.21	Arg
Thr	ACG(T)	102	0.37	Arg	AGG(R)	126	0.61		Thr	ACG(T)	116	0.41	Arg	AGG(R)	130	0.62		Thr	ACG(T)	107	0.39	Arg	AGG(R)	120	0.6		Thr	ACG(T)	111	0.41	Arg	AGG(R)	138	0.67		Thr	ACG(T)	109	0.38	Arg	AGG(R)	129	0.61		Thr	ACG(T)	121	0.43	Arg
Ala	GCU(A)	577	1.89	Gly	GGU(G)	540	1.46		Ala	GCU(A)	567	1.87	Gly	GGU(G)	537	1.42		Ala	GCU(A)	566	1.88	Gly	GGU(G)	530	1.44		Ala	GCU(A)	565	1.86	Gly	GGU(G)	523	1.42		Ala	GCU(A)	565	1.86	Gly	GGU(G)	534	1.42		Ala	GCU(A)	595	1.91	Gly
Ala	GCC(A)	172	0.56	Gly	GGC(G)	128	0.35		Ala	GCC(A)	183	0.6	Gly	GGC(G)	129	0.34		Ala	GCC(A)	170	0.56	Gly	GGC(G)	124	0.34		Ala	GCC(A)	165	0.54	Gly	GGC(G)	121	0.33		Ala	GCC(A)	186	0.61	Gly	GGC(G)	137	0.37		Ala	GCC(A)	181	0.58	Gly
Ala	GCA(A)	351	1.15	Gly	GGA(G)	617	1.66		Ala	GCA(A)	335	1.11	Gly	GGA(G)	626	1.66		Ala	GCA(A)	354	1.18	Gly	GGA(G)	612	1.67		Ala	GCA(A)	354	1.16	Gly	GGA(G)	610	1.66		Ala	GCA(A)	345	1.14	Gly	GGA(G)	607	1.62		Ala	GCA(A)	348	1.11	Gly
Ala	GCG(A)	119	0.39	Gly	GGG(G)	198	0.53		Ala	GCG(A)	125	0.41	Gly	GGG(G)	216	0.57		Ala	GCG(A)	114	0.38	Gly	GGG(G)	204	0.56		Ala	GCG(A)	132	0.43	Gly	GGG(G)	215	0.59		Ala	GCG(A)	117	0.39	Gly	GGG(G)	221	0.59		Ala	GCG(A)	125	0.4	Gly
[truncated: 107 more columns]
